# Supplementary material for: Identification of an O-antigen chain length regulator, WzzP, in Porphyromonas gingivalis
Source: PubMed Central journal article supplement (PMC3684754; doi:10.1002/mbo3.84), 2013-03-19
Supplement: mbo30002-0383-SD2.pdf [file mbo30002-0383-SD2.pdf]

# Supplemental 1

## TM1

|                |                                                               |     |
|----------------|---------------------------------------------------------------|-----|
| Poras_0604     | MTQSSLPNRAVYNEPTRSDEGTRPFTFSQILRLILKQWYWFVLSFVLFVVLGKIVADHRPL | 60  |
| PORUE0001_0693 | MTQSSLPNSAVNDQPNYPDEGSRPFTFSQILRLILRQWYWFVIFIAIFVWLGCSIVKYRPL | 60  |
| POREN0001_1785 | MDSTFSPSKTVLP-----QRMSFSAFVRLVVLNWNWFALSLVVAFGFIKMFNGSSAI     | 52  |
| PGN_2005       | MTEKSFRRSVLPLK-----DSVLTLFRRICLRNWNWILISVVLFAGWGVMVVKYKRAGM   | 51  |
|                | * . . . . . : : : * : : * : : * : : . . . :                   |     |
| Poras_0604     | GRQTYMQQLSSREPHLTPMMLTSDS-----TFKTSPTWPEYIATLNTTTAV           | 109 |
| PORUE0001_0693 | GRQTYMQQLSSREPHLTPMMLTSDS-----IPKTSPTWPEYIASLNTTTAV           | 109 |
| POREN0001_1785 | GNNKYRMAVMTRFPIQTSKSDKVFVDANS---GKEAPLWKHTPAFDAAQIYGWIVSADII  | 109 |
| PGN_2005       | APSTYFTTVMARFPEGVQRASSGGLNPNYVDNYTPRWEGISVLDQNSIFNGLCATSLV    | 111 |
|                | . . . * : : * * . . . : . . . * : : : :                       |     |
| Poras_0604     | VEAGRINFQVDYFVKTPWGMRDYINQTPIIIVHFDDLLPTDKVHCIAKLDDPVHPQQVTL  | 169 |
| PORUE0001_0693 | LEAGKRIDFQVDYVWVTPFGMRDYINQTPIIIVRFGNLLPTDKLYCIARLDDPVHPKEVTM | 169 |
| POREN0001_1785 | YRTGKREGFEVEYAQRSGFSSRDIYNHIFPRLIFPDAADADYFTLVVRQEA----DGLQL  | 165 |
| PGN_2005       | ERVGEKIQYDVNYYLPGKVTNHDFYDHTPIHLIFSPESALSSFTVKMKVEK----EHATI  | 167 |
|                | . . * . : : * : : * : : * : : * : : . . . : : . . . :         |     |
| Poras_0604     | SGFLGTAQGISINEP--YDVVIVPGSTQETPVGHVSITLDNPKHHFPYHIDQKHKKIALS  | 227 |
| PORUE0001_0693 | SAFSGVVQGOPLYEP--YDVVIVPGSTQETPVGPIITVTLDDPAQHFPYHIDQYTEIPIT  | 227 |
| POREN0001_1785 | SQIKGVYQKELKGTGSYTILLPNWSTVETPVGKVIQDNPGWEEYGIKRSYALDKPIIIT   | 225 |
| PGN_2005       | LSLKGKHDGEKVSIIK---DIRLPYGISVATPIGELRVEKTPRFDYETSKKDFFSKPIIIV | 224 |
|                | : * : * : : : * . : * : * : : : . . . : * :                   |     |
| Poras_0604     | YS-TLQDIRAVYETEMQVTMCKADLPSSVMRVEMLSNRSERRCLDLLYQMYLVTDSLWG   | 286 |
| PORUE0001_0693 | YT-SLVEARDIYETEMQVTMCKADLPSSVMRVELLSGRSERRCLSLNAMYVVTDSLWG    | 286 |
| POREN0001_1785 | RR-SVIETRAQYDWMVIDN-----TLPNFLNVEVSTTGSARRAKQILAGMLVDLDSLVR   | 279 |
| PGN_2005       | TKESKDKARVLYDSGLRTEE-----SKGRIEMRITIKRSLGFARDFLDGIIIEFDIQR    | 278 |
|                | : . * * : : . . : : * . . : * : * :                           |     |
| Poras_0604     | VEQLSDEGVTDSLQGFAG--TVPPAGLSP-----FRLIDEPRIAKDLEPDLFIIAG-     | 335 |
| PORUE0001_0693 | VEQLTDEGHVDSLQGFVG--TVPPAGLSP-----FRLVDKPRELREIEPDLFVIVG-     | 335 |
| POREN0001_1785 | YNVTLDDLKEQEMIEAALRRLMHPDLSLSPS-----LTAESRTQEIKEQLQRLARTISN   | 332 |
| PGN_2005       | EKYRQVEVEEKIALAEKSLSDLQKSEGPVSDSTLVSLGITEKERNADSEALRKKLVSMINE | 338 |
|                | : : : : . . . : . . . * . . .                                 |     |
|                | TM2                                                           |     |
| Poras_0604     | -----MGLLGLLLPLLLMYIYWAIIRGVIYY                               | 360 |
| PORUE0001_0693 | -----MGLLGFLLIPLLLLYIYWAILGAIYY                               | 360 |
| POREN0001_1785 | REVLRYDHLIE---VTASPAIQSPVGFVSKIIIFLLGLIIPVLIYAWLLRGSVLE       | 388 |
| PGN_2005       | YKVDLLTADASSSLIVLDKTKSVPVSKKDLLLILINLVMGLFFPMIIFVYIVFRNLILV   | 398 |
|                | : : * : : * : : * : : * : : . . . :                           |     |
| Poras_0604     | VSELPSLLRHRLT--LDLKRGRKGGKPLYPNLEELCALVMPP---QGEPRTIQLATPNST  | 415 |
| PORUE0001_0693 | VCELPRLLRSRLT--LDLQRRHKG-KTLYPHLEELCALVSP---QGEPRAIQLVTPSGT   | 413 |
| POREN0001_1785 | PRQLSPFWQKALISTLRLHRKRGNYSDTPETIDALRFTLQSNLEEDTARPIILFTTPSKS  | 448 |
| PGN_2005       | PSELGEKALKRILALLNGNKKRAATMQRDIDLRLNLTETFLP---DSASSCIILTGMSSGN | 455 |
|                | : * : : * : : * : : * : : . . . :                             |     |
| Poras_0604     | KYHQQLLAEQLQALEQRGISCAVWHLDLAEQKAVSKT--PSDVYHTTITPGLISSSTAFQQ | 473 |
| PORUE0001_0693 | KYHRQLASELQALQQRGISCAVWYLDLANQKKASKG--SNGVYHTTITPGLIGSSSAFEQ  | 471 |
| POREN0001_1785 | SKAQKRLNKLVDLAASYSLGGNGTGKIVHLLHASNNSVPTLSHARIEQGYWGGKQFSQ    | 508 |
| PGN_2005       | EQTERIATELVSSFERK-----GKNFQILHLEES-----DAALK                  | 489 |
|                | . : : * : . . . . . :                                         |     |
| Poras_0604     | QLKQLQTQHQLTI IASPALMEDPTAYLLSSSVEQSLYCIYRGSTRVRAIKRIVHQLQIRQ | 533 |
| PORUE0001_0693 | QLKQLQTQHQLTI IVPALT KDPTAYLLN-SLEQSLYCIYRGSTRIGAIKRVVHQLQIRQ | 530 |
| POREN0001_1785 | DLAPAEAEKKTPTLLIAPFDS---VHLLASQVAQIVVVEQDQSRPTLLSDLEHLSLQGT   | 565 |
| PGN_2005       | EMTALREKGISVFAIAPSVVRSALAVEVSVFVADVSLLLAESMHSKRNDKDEVEAFICQSR | 549 |
|                | : : . : . . . . . : : : . : : :                               |     |
| Poras_0604     | LLDRSRIEILWIE-----                                            | 546 |
| PORUE0001_0693 | QLDRSHIHTLWVE-----                                            | 543 |
| POREN0001_1785 | PP----IHALWVCNIFPFFR                                          | 581 |
| PGN_2005       | CP----AFVLWLDRY-----                                          | 560 |
|                | **:                                                           |     |

Supplemental 3

A

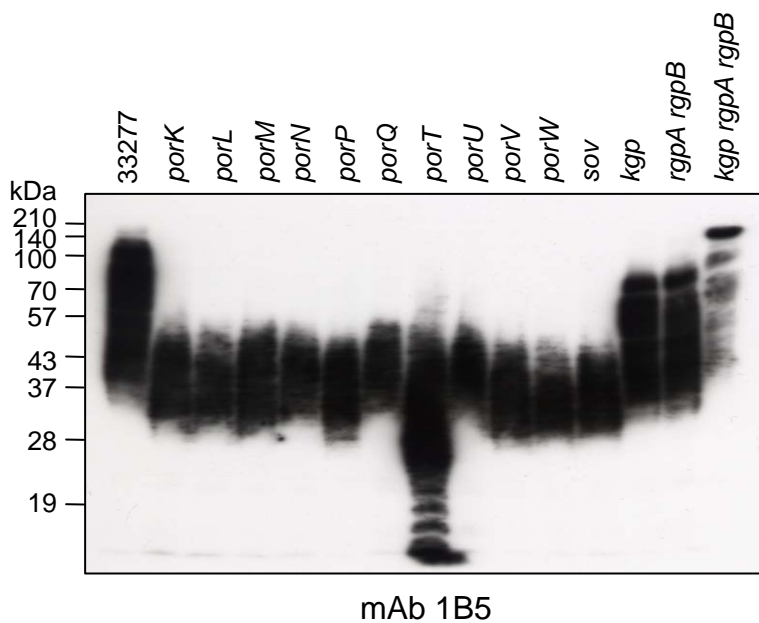

mAb 1B5

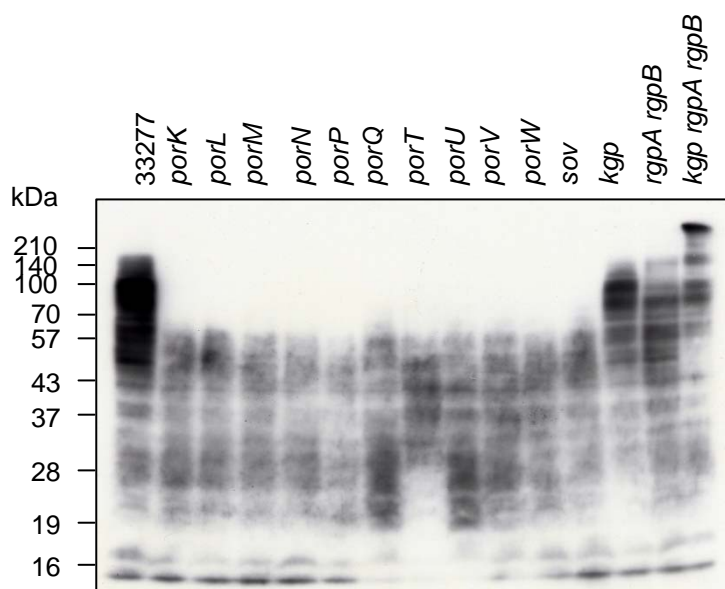

mAb TDC-5-2-1

B

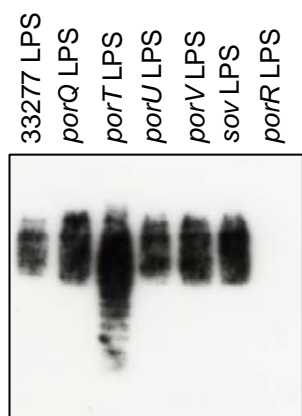

mAb 1B5

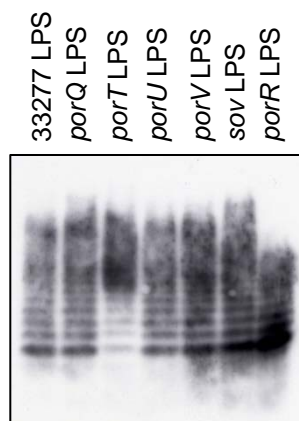

mAb TDC-5-2-1
