# Supplementary material for: Identification of an O-antigen chain length regulator, WzzP, in Porphyromonas gingivalis
Source: PubMed Central journal article supplement (PMC3684754; doi:10.1002/mbo3.84), 2013-03-19

## Supplemental 2

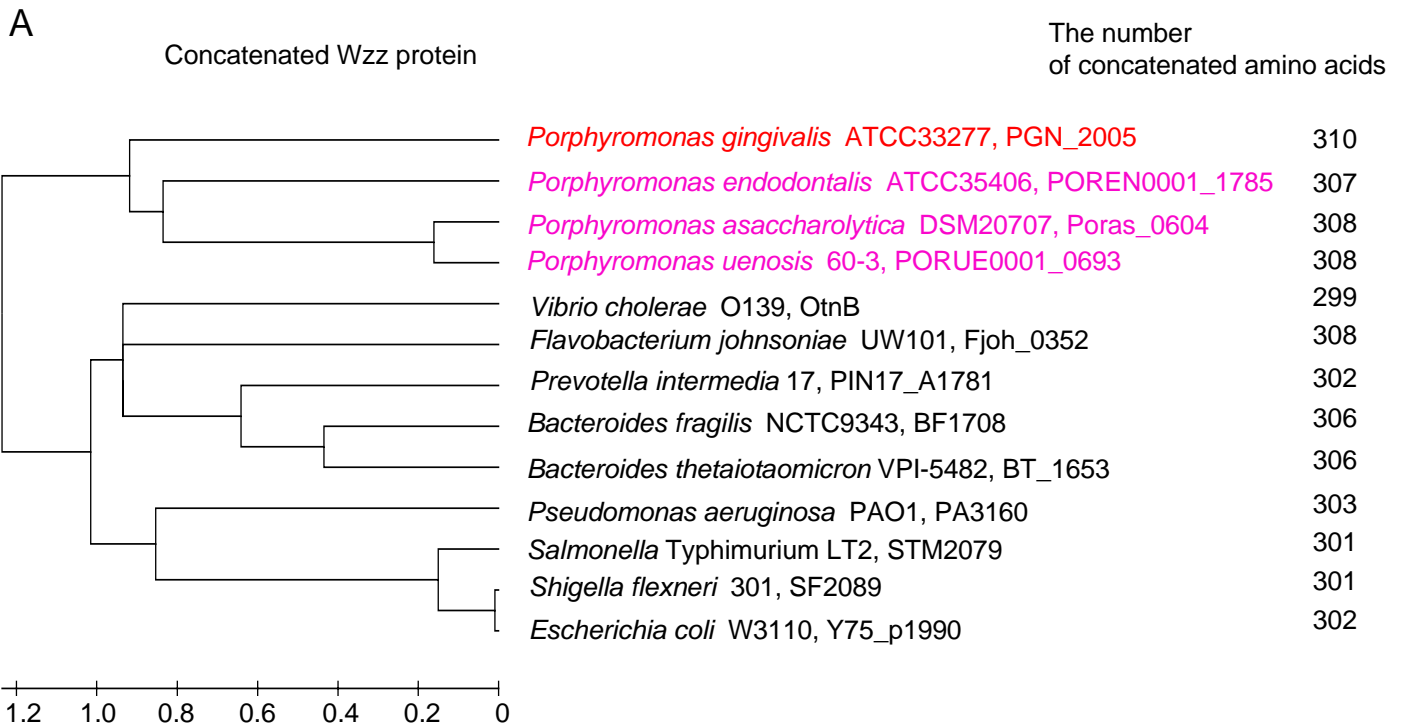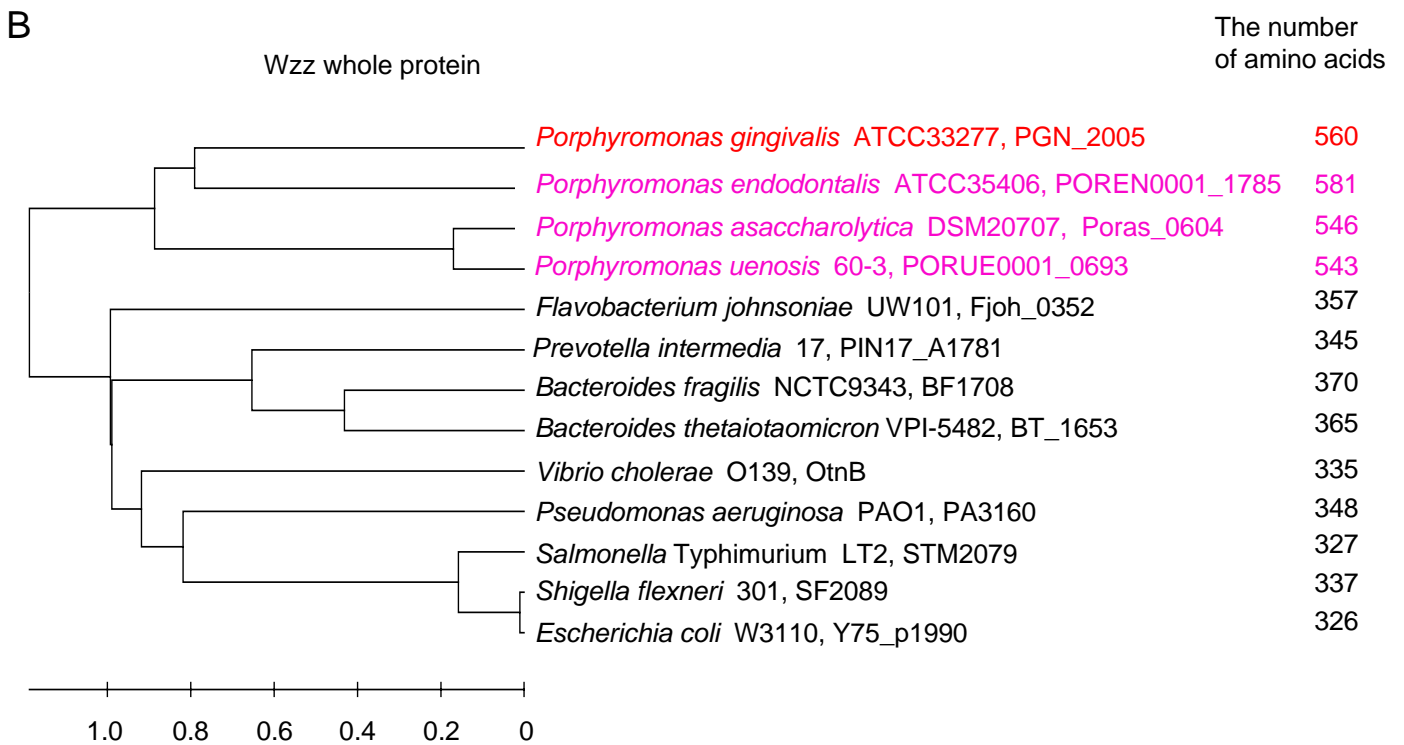

Supplement: mbo30002-0383-SD3.pdf [file mbo30002-0383-SD3.pdf]
