# Supplementary material for: Identification of an O-antigen chain length regulator, WzzP, in Porphyromonas gingivalis
Source: PubMed Central journal article supplement (PMC3684754; doi:10.1002/mbo3.84), 2013-03-19
Supplement: mbo30002-0383-SD4.pdf [file mbo30002-0383-SD4.pdf]

Table S1. Comparative genome analyses of A-LPS biosynthesis related genes.

| Strain                      | <i>man</i>                          | <i>hypothetical</i> | <i>vimA</i>    | <i>porR</i>                                      |
|-----------------------------|-------------------------------------|---------------------|----------------|--------------------------------------------------|
| <i>P. gin</i> ATCC33277     | PGN_0242                            | PGN_0663            | PGN_1056       | PGN_1236                                         |
| <i>P. gin</i> W83           | PG0129                              | PG0621              | PG0882         | PG1138                                           |
| <i>P. gin</i> TDC60         | PGTDC60_0406                        | PGTDC60_1749        | PGTDC60_0810   | PGTDC60_1075                                     |
| <i>P. asa</i> DSM20707      | Poras_1033                          | Poras_1142          | Poras_0672     | Poras_0235<br>Poras_0456<br>Poras_0968           |
| <i>P. uenosis</i> 60-3      | PORUE0001_0304<br>PORUE0001_1218    | PORUE0001_1022      | PORUE0001_1328 | PORUE0001_0620<br>PORUE0001_1509                 |
| <i>P. endo</i> ATCC35406    | POREN0001_0178                      | POREN0001_0416      | POREN0001_1221 | POREN0001_0099<br>POREN0001_0534                 |
| <i>P. int</i> 17            | PIN17_A1289                         | PIN17_A1908         | ND             | PIN17_A1561<br>PIN17_A1764                       |
| <i>T. for</i> ATCC43037     | BFO_0475                            | BFO_2611            | BFO_2568       | BFO_0923<br>BFO_1073                             |
| <i>F. joh</i> UW101         | Fjoh_0326<br>Fjoh_1035<br>Fjoh_2513 | Fjoh_3498           | ND             | Fjoh_0323<br>Fjoh_0334<br>Fjoh_1727<br>Fjoh_2237 |
| <i>B. fragilis</i> NCTC9343 | BF0920                              | BF3731              | ND             | BF0734<br>BF0752<br>BF1376<br>BF2604             |
| <i>B. the</i> VPI-5482      | BT_4282<br>BT_4304                  | BT_3927             | ND             | BT_0612<br>BT_2885<br>BT_3376                    |

| Strain                      | <i>wzy</i>                 | <i>gtfB</i>                            | <i>rfa</i>     | <i>waal</i>    |
|-----------------------------|----------------------------|----------------------------------------|----------------|----------------|
| <i>P. gin</i> ATCC33277     | PGN_1242                   | PGN_1251                               | PGN_1255       | PGN_1302       |
| <i>P. gin</i> W83           | PG1142                     | PG1149                                 | PG1155         | PG1051         |
| <i>P. gin</i> TDC60         | PGTDC60_1070               | PGTDC60_1060                           | PGTDC60_1065   | PGTDC60_0972   |
| <i>P. asa</i> DSM20707      | Poras_0568                 | Poras_1033<br>Poras_1145<br>Poras_1514 | ND             | Poras_0494     |
| <i>P. uenosis</i> 60-3      | PORUE0001_1456             | PORUE0001_0103                         | ND             | PORUE0001_1746 |
| <i>P. endo</i> ATCC35406    | POREN0001_1267             | ND                                     | POREN0001_1404 | POREN0001_0324 |
| <i>P. int</i> 17            | PIN17_A1783                | PIN17_A1552                            | PIN17_A0550    | ND             |
| <i>T. for</i> ATCC43037     | ND                         | BFO_1049                               | BFO_1088       | ND             |
| <i>F. joh</i> UW101         | Fjoh_2813                  | Fjoh_0341<br>Fjoh_2243                 | Fjoh_1046      | Fjoh_0291      |
| <i>B. fragilis</i> NCTC9343 | BF1018<br>BF3456<br>BF3686 | BF2052<br>BF2595                       | ND             | ND             |
| <i>B. the</i> VPI-5482      | BT_1343<br>BT_1710         | BT_0053<br>BT_1180<br>BT_2866          | BT_3362        | ND             |

| Strain               | wzz                           | wzx                                                                | wbaP                       |
|----------------------|-------------------------------|--------------------------------------------------------------------|----------------------------|
| P. gin ATCC33277     | PGN_2005                      | PGN_1033                                                           | PGN_1896                   |
| P. gin W83           | PG0056                        | PG0912<br>PG0117                                                   | PG1964                     |
| P. gin TDC60         | PGTDC60_0338                  | PGTDC60_0836                                                       | PGTDC60_0237               |
| P. asa DSM20707      | Poras_0604                    | Poras_0962                                                         | Poras_0564                 |
| P. uenosis 60-3      | PORUE0001_0693                | PORUE0001_0631                                                     | PORUE0001_0240             |
| P. endo ATCC35406    | POREN0001_1785                | POREN0001_1270                                                     | POREN0001_0361             |
| P. int 17            | PIN17_A1781                   | PIN17_A1782                                                        | PIN17_A1560<br>PIN17_A1779 |
| T. for ATCC43037     | ND                            | BFO_1985                                                           | BFO_1803<br>BFO_3047       |
| F. joh UW101         | Fjoh_0352                     | Fjoh_0345                                                          | Fjoh_4994                  |
| B. fragilis NCTC9343 | BF1708                        | BF1369<br>BF1556<br>BF1900<br>BF2055<br>BF2598<br>BF2791<br>BF4298 | BF1377                     |
| B. the VPI-5482      | BT_1355<br>BT_1653<br>BT_1722 | BT_0040<br>BT_0047<br>BT_1354                                      | BT_0480                    |

*man*, putative mannosyl transferase

ND, not detected

P. gin, *Porphyromonas gingivalis* ATCC33277, W83 or TDC60

P. asa, *Porphyromonas asaccharolytica* DSM20707

P. uenosis, *Porphyromonas uenosis* 60-3

P. endo, *Porphyromonas endodontalis* ATCC35406

P. int, *Prevotella intermedia* 17

T. for, *Tannerella forsythia* ATCC43037

F. joh, *Flavobacterium johnsoniae* UW101

B. fragilis, *Bacteroides fragilis* NCTC9343

B. the, *Bacteroides thetaiotaomicron* VPI-5482
