# Supplementary material for: Identification of an O-antigen chain length regulator, WzzP, in Porphyromonas gingivalis
Source: PubMed Central journal article supplement (PMC3684754; doi:10.1002/mbo3.84), 2013-03-19
Supplement: mbo30002-0383-SD5.pdf [file mbo30002-0383-SD5.pdf]

Table S2. Bacterial strains used in this study.

| <i>P. gingivalis</i> strains | Description                                                                              | Reference or source                 |
|------------------------------|------------------------------------------------------------------------------------------|-------------------------------------|
| 33277                        | Wild type                                                                                | ATCC                                |
| KDP107                       | <i>porR</i> ::Em <sup>f</sup>                                                            | Shoji et al. 2002                   |
| KDP117                       | <i>porT</i> ::Em <sup>f</sup>                                                            | Sato et al. 2005                    |
| KDP129                       | <i>kgp</i> ::Cm <sup>f</sup>                                                             | Shi et al. 1999                     |
| KDP133                       | <i>rgpA</i> ::Em <sup>f</sup> <i>rgpB</i> ::Tc <sup>f</sup>                              | Shi et al. 1999                     |
| KDP136                       | <i>kgp</i> ::Cm <sup>f</sup> <i>rgpA</i> ::Em <sup>f</sup> <i>rgpB</i> ::Tc <sup>f</sup> | Shi et al. 1999                     |
| KDP200                       | PGN_0242::Em <sup>f</sup>                                                                | Shoji et al. 2011                   |
| KDP201                       | PGN_0663::Em <sup>f</sup>                                                                | Shoji et al. 2011                   |
| KDP202                       | <i>vimA</i> ::Tc <sup>f</sup>                                                            | Shoji et al. 2011                   |
| KDP203                       | <i>waaL</i> ::Em <sup>f</sup>                                                            | Shoji et al. 2011                   |
| KDP204                       | <i>wzy</i> ::Em <sup>f</sup>                                                             | Shoji et al. 2011                   |
| KDP205                       | PGN_2005::Tn4400', Tc <sup>f</sup>                                                       | This study                          |
| KDP206                       | PGN_2005::Em <sup>f</sup>                                                                | This study                          |
| KDP207                       | PGN_2005::Em <sup>f</sup> <i>porT</i> ::Ap <sup>f</sup>                                  | This study                          |
| KDP208                       | PGN_1033::Em <sup>f</sup>                                                                | This study                          |
| KDP209                       | PGN_1916-1917::Em <sup>f</sup>                                                           | This study                          |
| KDP210                       | PGN_2066::Em <sup>f</sup>                                                                | This study                          |
| KDP211                       | PGN_2072::Em <sup>f</sup>                                                                | This study                          |
| KDP212                       | PGN_1523-1525::Em <sup>f</sup>                                                           | This study                          |
| KDP213                       | PGN_1362-1363::Em <sup>f</sup>                                                           | This study                          |
| KDP214                       | PGN_1896::Em <sup>f</sup>                                                                | This study                          |
| KDP215                       | PGN_0223-0227::Em <sup>f</sup>                                                           | This study                          |
| KDP216                       | PGN_1233::Tc <sup>f</sup>                                                                | This study                          |
| KDP217                       | PGN_1233::Tc <sup>f</sup> PGN_1896::Em <sup>f</sup>                                      | This study                          |
| KDP218                       | PGN_2005::Em <sup>f</sup> /pKD888                                                        | This study                          |
| KDP219                       | PGN_2005::Em <sup>f</sup> <i>porT</i> ::Ap <sup>f</sup> /pKD888                          | This study                          |
| KDP354                       | <i>porP</i> ::Em <sup>f</sup>                                                            | Sato et al. 2010                    |
| KDP355                       | <i>porK</i> ::Em <sup>f</sup>                                                            | Sato et al. 2010                    |
| KDP356                       | <i>porL</i> ::Em <sup>f</sup>                                                            | Sato et al. 2010                    |
| KDP357                       | <i>porM</i> ::Em <sup>f</sup>                                                            | Sato et al. 2010                    |
| KDP358                       | <i>porN</i> ::Em <sup>f</sup>                                                            | Sato et al. 2010                    |
| KDP359                       | <i>porW</i> ::Em <sup>f</sup>                                                            | Sato et al. 2010                    |
| KDP360                       | <i>porU</i> ::Em <sup>f</sup>                                                            | Sato et al. 2010                    |
| KDP361                       | <i>porV</i> ::Em <sup>f</sup>                                                            | Shoji et al. 2011                   |
| KDP362                       | <i>porQ</i> ::Em <sup>f</sup>                                                            | Sato et al. 2010                    |
| KDP365                       | <i>sov</i> ::Em <sup>f</sup>                                                             | Sato et al. 2010                    |
| KDP400                       | <i>gtfB</i> ::Em <sup>f</sup>                                                            | Yamaguchi et al. 2010               |
| Prfa1                        | <i>rfa</i> ::Em <sup>f</sup>                                                             | Sato et al. 2009                    |
| W83                          | Wild type                                                                                | Gift from M. J. Duncan <sup>a</sup> |
| TDC60                        | Wild type                                                                                | Gift from K. Ishihara <sup>b</sup>  |
| TDC117                       | Wild type                                                                                | Gift from K. Ishihara <sup>b</sup>  |
| TDC275                       | Wild type                                                                                | Gift from K. Ishihara <sup>b</sup>  |
| GAI7802                      | Wild type                                                                                | Gift from E. Hoshino <sup>c</sup>   |
| SU63                         | Wild type                                                                                | Gift from M. Yoneda <sup>d</sup>    |
| HG66                         | non pigmented strain                                                                     | Gift from J. Potempa <sup>e</sup>   |

  

| <i>E. coli</i> strains | Description                                                  | Source or reference                  |
|------------------------|--------------------------------------------------------------|--------------------------------------|
| XL-1Blue               | General purpose host strain for cloning                      | Stratagene                           |
| BL21(DE3)              | Host strain for protein expression                           | Novagen                              |
| S17-1                  | RP-4-2-Tc::Mu <i>aph</i> ::Tn7 <i>recA</i> , Sm <sup>f</sup> | Simon et al. 1983                    |
| W3110                  | <i>rph-1</i> 1N( <i>rrnD-rrnE</i> )                          | Gift from M. A. Valvano <sup>f</sup> |
| EVV16                  | W3110 $\Delta$ <i>wzzE</i> ::Km <sup>f</sup>                 | Vinés et al. 2005                    |

a Department of Molecular Genetics, The Forsyth Institute, Boston, MA.

b Department of Microbiology, Tokyo Dental College, Chiba, Japan.

c Department of Oral Health Science, Graduate School of Medical and Dental Sciences, Niigata University, Niigata, Japan.

d Department of General Dentistry, Fukuoka Dental College, Fukuoka, Japan.

e Faculty of Biochemistry Biophysics and Biotechnology, Jagiellonian University, Krakow, Poland.

f Department of Microbiology and Immunology, University of Western Ontario, Ontario, Canada.
