# Supplementary material for: Identification of an O-antigen chain length regulator, WzzP, in Porphyromonas gingivalis
Source: PubMed Central journal article supplement (PMC3684754; doi:10.1002/mbo3.84), 2013-03-19
Supplement: mbo30002-0383-SD6.pdf [file mbo30002-0383-SD6.pdf]

Table S3. Plasmids used in this study.

| Plasmids             | Description                                                                                   | Source or reference    |
|----------------------|-----------------------------------------------------------------------------------------------|------------------------|
| pBAD/Myc-His A       | Ap <sup>r</sup> , arabinose inducible expression plasmid                                      | Invitrogen             |
| pBluescript II SK(-) | Ap <sup>r</sup> , cloning vector                                                              | Stratagene             |
| pCR4                 | Ap <sup>r</sup> Km <sup>r</sup> , PCR Topo cloning vector                                     | Invitrogen             |
| pET30 Ek/LIC         | Km <sup>r</sup> , IPTG inducible expression plasmid                                           | Novagen                |
| pGEM-T Easy          | Ap <sup>r</sup> , PCR cloning vector                                                          | Promega                |
| pKD375               | Ap <sup>r</sup> Tc <sup>r</sup> , pUC19- <i>tetQ</i>                                          | Shi et al., 1999       |
| pKD740               | Ap <sup>r</sup> Em <sup>r</sup> , pGEM-T Easy- <i>hbp35</i> up- <i>ermF</i> - <i>hbp35</i> dw | Shoji et al., 2010     |
| pKD870               | Ap <sup>r</sup> Em <sup>r</sup> , pBSSK-PGN_2005 up- <i>ermF</i> -PGN_2005 dw                 | This study             |
| pKD871               | Ap <sup>r</sup> , pBSSK- <i>porT</i> up- <i>cepA</i> - <i>porT</i> dw                         | This study             |
| pKD872               | Ap <sup>r</sup> Em <sup>r</sup> , pGEM-T Easy-PGN_1033 up- <i>ermF</i> -PGN_1033 dw           | This study             |
| pKD873               | Ap <sup>r</sup> Em <sup>r</sup> , pGEM-T Easy-PGN_1917 up- <i>ermF</i> -PGN_1916 dw           | This study             |
| pKD874               | Ap <sup>r</sup> Em <sup>r</sup> , pGEM-T Easy-PGN_2066 up- <i>ermF</i> -PGN_2066 dw           | This study             |
| pKD875               | Ap <sup>r</sup> Em <sup>r</sup> , pGEM-T Easy-PGN_2072 up- <i>ermF</i> -PGN_2072 dw           | This study             |
| pKD876               | Ap <sup>r</sup> Em <sup>r</sup> , pGEM-T Easy-PGN_1523 up- <i>ermF</i> -PGN_1525 dw           | This study             |
| pKD877               | Ap <sup>r</sup> Em <sup>r</sup> , pGEM-T Easy-PGN_1362 up- <i>ermF</i> -PGN_1363 dw           | This study             |
| pKD878               | Ap <sup>r</sup> Em <sup>r</sup> , pGEM-T Easy-PGN_1896 up- <i>ermF</i> -PGN_1896 dw           | This study             |
| pKD879               | Ap <sup>r</sup> Em <sup>r</sup> , pGEM-T Easy-PGN_0223 up- <i>ermF</i> -PGN_0227 dw           | This study             |
| pKD880               | Ap <sup>r</sup> Tc <sup>r</sup> , pBSSK- <i>tetQ</i>                                          | This study             |
| pKD881               | Ap <sup>r</sup> Tc <sup>r</sup> , pGEM-T Easy- <i>hbp35</i> up- <i>tetQ</i> - <i>hbp35</i> dw | This study             |
| pKD882               | Ap <sup>r</sup> Tc <sup>r</sup> , pGEM-T Easy-PGN_1233 up- <i>tetQ</i> -PGN_1233 dw           | This study             |
| pKD883               | Ap <sup>r</sup> , pGEM-T Easy-PGN_2005                                                        | This study             |
| pKD884               | Ap <sup>r</sup> , pGEM-T Easy- <i>catalase</i> pro                                            | This study             |
| pKD885               | Ap <sup>r</sup> , pGEM-T Easy- <i>catalase</i> pro-PGN_2005                                   | This study             |
| pKD886               | Ap <sup>r</sup> , pBSSK- <i>rgpB</i> ter                                                      | This study             |
| pKD887               | Ap <sup>r</sup> , pBSSK- <i>catalase</i> pro-PGN_2005- <i>rgpB</i> ter                        | This study             |
| pKD888               | Ap <sup>r</sup> Tc <sup>r</sup> , pTCB- <i>catalase</i> pro-PGN_2005- <i>rgpB</i> ter         | This study             |
| pKD889               | Km <sup>r</sup> , pET30 Ek/LIC PGN_2005 [L <sup>395</sup> -Y <sup>560</sup> ]                 | This study             |
| pKD890               | Ap <sup>r</sup> , pUC118-PGN_2005                                                             | This study             |
| pKD891               | Ap <sup>r</sup> , pBAD/Myc-His A-PGN_2005                                                     | This study             |
| pKD955               | Ap <sup>r</sup> , pBSSK- <i>catalase</i> pro- <i>porK</i> - <i>rgpB</i> ter                   | Sato et al., 2010      |
| pMF19                | Sp <sup>r</sup> , pEXT21- <i>wbbL</i> ( <i>rhamnosyltransferase</i> )                         | Feldman et al., 1999   |
| pTCB                 | Ap <sup>r</sup> , Tc <sup>r</sup> , <i>E. coli</i> - <i>P. gingivalis</i> shuttle plasmid     | Nagano et al., 2007    |
| pUC118               | Ap <sup>r</sup> , cloning vector                                                              | Takara                 |
| pWzzB-SF             | Ap <sup>r</sup> , pBAD24- <i>wzzB</i> <sub>SF</sub>                                           | Kalynychn et al., 2011 |
| pWzzB-ST             | Ap <sup>r</sup> , pBAD24- <i>wzzB</i> <sub>ST</sub>                                           | Kalynychn et al., 2011 |
