# Supplementary material for: Identification of an O-antigen chain length regulator, WzzP, in Porphyromonas gingivalis
Source: PubMed Central journal article supplement (PMC3684754; doi:10.1002/mbo3.84), 2013-03-19
Supplement: mbo30002-0383-SD7.pdf [file mbo30002-0383-SD7.pdf]

Table S4. Oligonucleotides used in this study.

| Primers        | Nucleotide sequences (5'-)                     | Description of underline |
|----------------|------------------------------------------------|--------------------------|
| PGN_2005upFw   | <u>GCGGCCGCGCTTCTGTACTGAACACGCTG</u>           | NotI                     |
| PGN_2005upBw   | <u>TGGATCCTCGCTCATACTATTAATAGCTG</u>           | BamHI                    |
| PGN_2005dwFw   | <u>AGGATCCTGGTTGGATAGGTATTAAGGGG</u>           | BamHI                    |
| PGN_2005dwBw   | <u>TGGTACCGTTTCGATGCTCTCGCATCAACT</u>          | KpnI                     |
| PorTupFw       | <u>TAGGTCGACAGCGCTTGC GGCGGAAAAAGAAG</u>       |                          |
| PorTupBw       | <u>TAGGATCCTAGTTGTACAGCTCTTTTCGAC</u>          | BamHI                    |
| PorTdwFw       | <u>GTGAATTCCTGAGAGAATAATCTTCAATTCT</u>         | EcoRI                    |
| PorTdwBw       | <u>GCGGCCGCTATACAGGATCGTATTGAGTGCT</u>         | NotI                     |
| PGN_1033upFw   | <u>GCATGCGTTACGAAGTATCGCAATCGCAA</u>           | SphI                     |
| PGN_1033upBw   | <u>GGATCCAACAGACCATAAAGATACTACAA</u>           | BamHI                    |
| PGN_1033dwFw   | <u>CTGCAGAAAGCCTACCTCCATATCCGATT</u>           | PstI                     |
| PGN_1033dwBw   | <u>GAGCTCCACTCGAAGTATGCAGTGGTGTC</u>           | SacI                     |
| PGN_1917upFw   | <u>GCATGCTTGTCCGGCGGCACCTCTCCGTA</u>           | SphI                     |
| PGN_1917upBw   | <u>GGATCCTTGATTGGTTGTTTCTGTTGTT</u>            | BamHI                    |
| PGN_1916dwFw   | <u>CTGCAGGGAAACGTGAGTTCGATGTAAGC</u>           | PstI                     |
| PGN_1916dwBw   | <u>GAGCTCAGCCGGAGGTGGTATCGGCTCGT</u>           | SacI                     |
| PGN_2066upFw   | <u>GCATGCAAGCAGTTTCCCTCGCATACTT</u>            | SphI                     |
| PGN_2066upBw   | <u>GGATCCGACTTCGTGCTCATTCGTTTGAT</u>           | BamHI                    |
| PGN_2066dwFw   | <u>CTGCAGGCTCAACCTCCCCCTCTCTTCT</u>            | PstI                     |
| PGN_2066dwBw   | <u>GAGCTCATCTCCGAAGGTGGCTGTAACCG</u>           | SacI                     |
| PGN_2072upFw   | <u>GCATGCGCTTTGGAGGATACTTTGCCGAT</u>           | SphI                     |
| PGN_2072upBw   | <u>GGATCCTATTATATGCTTGATTTCGATCG</u>           | BamHI                    |
| PGN_2072dwFw   | <u>CTGCAGGCGTCTTTTCGGCCGCAACGAGA</u>           | PstI                     |
| PGN_2072dwBw   | <u>GAGCTCTACATTATGAAGAAATTCATGAT</u>           | SacI                     |
| PGN_1523upFw   | <u>GCATGCCATGAAGCTGCTGCCGTGCCGTC</u>           | SphI                     |
| PGN_1523upBw   | <u>GGATCCAATTGATTTATGGCTTAAAAAAG</u>           | BamHI                    |
| PGN_1525dwFw   | <u>CTGCAGTATCTGACAGATACATTTGTTTG</u>           | PstI                     |
| PGN_1525dwBw   | <u>GAGCTCGCCACTGCTTCTGCGGAACAGCC</u>           | SacI                     |
| PGN_1362upFw   | <u>GCATGCGAGAAAGATAGAACGAACCTTCTTC</u>         | SphI                     |
| PGN_1362upBw   | <u>GGATCCGAGTTTCTGTCCGGTCGGTCTTT</u>           | BamHI                    |
| PGN_1363dwFw   | <u>CTGCAGACAGAGAGTGAGACGGCACACAG</u>           | PstI                     |
| PGN_1363dwBw   | <u>GAGCTCTGCGTTCGAGATCGAAGTCGGTG</u>           | SacI                     |
| PGN_1896upFw   | <u>GCATGCTACCCGACAGATACCATTTGGGG</u>           | SphI                     |
| PGN_1896upBw   | <u>GGATCCTGGCGGATCACCTCCACTTCTCC</u>           | BamHI                    |
| PGN_1896dwFw   | <u>CTGCAGAGGATAAGGAAACGAGTCGCTAC</u>           | PstI                     |
| PGN_1896dwBw   | <u>GAGCTCGGCCCCACACCCACGAGGAGCA</u>            | SacI                     |
| PGN_0223upFw   | <u>GCATGCCTCCAATAATCCATCCGGCTACC</u>           | SphI                     |
| PGN_0223upBw   | <u>GGATCCCACAACAATATCTTCAATAACAT</u>           | BamHI                    |
| PGN_0227dwFw   | <u>CTGCAGAAGAAAAAGTAATGGGAATAGC</u>            | PstI                     |
| PGN_0227dwBw   | <u>GAGCTCGGGAGCTTATGATTTCAATGAC</u>            | SacI                     |
| PGN_1233upFw   | <u>GCATGCTTTTGT TTTTTTTGCCACTTCCA</u>          | SphI                     |
| PGN_1233upBw   | <u>GGATCCTATCTTCCAATTCAAGGCACTAT</u>           | BamHI                    |
| PGN_1233dwFw   | <u>CTGCAGGTAAGCTCCGATTGCATAGGGG</u>            | PstI                     |
| PGN_1233dwBw   | <u>GAGCTCGCTACGGAAAGCGTATCTATGAT</u>           | SacI                     |
| PGN_2005compFw | <u>GTGCGACTTGACTGAGAAAATCATTTCGAAGT</u>        | Sall                     |
| PGN_2005compBw | <u>CTGCAGTTAATACCTATCCAACCATAGCAC</u>          | PstI                     |
| p6-34-F-NotI   | <u>GCGGCCGCTTCGTCTGTCATCAGCATCCCAG</u>         | NotI                     |
| p6-34-R-Sall   | <u>GTGCGACTGTTTTGTCTCTTATTTAAGTTA</u>          | Sall                     |
| 506-TF-PstI    | <u>ACTGCAGTTCACACTGCAATTCTCTAAT</u>            | PstI                     |
| 506-TR-NotI    | <u>GCGGCCGCCCCTACCCGACCATAAACCGCCA</u>         | NotI                     |
| PGN_2005expFw  | <u>GACGACGACAAGATGCTCATATTGGTACCTTCGGAACCT</u> |                          |
| PGN_2005expBw  | <u>GAGGAGAAGCCCGGTGCATACCTATCCAACCATAGCACA</u> |                          |
